# Supplementary material for: No Impact of Seasonality of Diagnoses on Baseline Tumor Immune Infiltration, Response to Treatment, and Prognosis in BC Patients Treated with NAC
Source: MDPI journal article supplement (doi:10.3390/cancers14133080), 2022-06-23
Supplement: s1 [file s1]

**SUPPLEMENTARY FIGURES**

**Supplementary Figure S1.** Associations between pre-NAC TILs and month in whole population, and after stratification by breast cancer subtype. Bottom and top bars of the boxplots represent the first and third quartiles, respectively, the medium bar is the median, and whiskers extend to 1.5 times the interquartile range. **A**, Pre-NAC str TIL levels according to month. **B**, Pre-NAC IT TIL levels according to month. **C**, Pre-NAC str TIL levels according to month and breast cancer subtype. **D**, Pre-NAC IT TIL levels according to month and breast cancer subtype.

**Supplementary Figure S2.** Barplot of associations between response to treatment and season at breast cancer diagnosis in the whole population, and by chemotherapy regimen. **A**, among the whole population. **B**, by chemotherapy regimen.

**Supplementary Figure S3.** RCB class distribution among the whole population and by season at breast cancer diagnosis. **A**, among the whole population. **B**, in each season.

**Supplementary Figure S4.** Post-NAC TIL levels by season at BC diagnosis in the general population and by breast cancer subtype. Differences among seasons. The first and third quartiles are represented by the bottom and top bars of the boxplots, respectively; the median is represented by the medium bar, and whiskers extend to 1.5 times the interquartile range. **A**, stromal lymphocytes among the whole population. **B**, stromal lymphocytes in each BC subtype.

**Supplementary Figure S5.** Associations between post-NAC TILs and month in whole population, and after stratification by breast cancer subtype. Bottom and top bars of the boxplots represent the first and third quartiles, respectively, the medium bar is the median, and whiskers extend to 1.5 times the interquartile range. **A**, Post-NAC str TIL levels according to month. **B**, Post-NAC IT TIL levels according to month. **C**, Post-NAC str TIL levels according to month and breast cancer subtype. **D**, Post-NAC IT TIL levels according to month and breast cancer subtype.

**Supplementary Figure S6.** Distant relapse-free survival curves by season at BC diagnosis. **A**, Distant relapse-free survival curves according to season. **B**, Distant relapse-free survival curves in Luminal breast cancer according to season. **C**, Distant relapse-free survival curves in TNBC breast cancer according to season. **D**, Distant relapse-free survival curves in Her2-positive breast cancer according to season.

**Supplementary Figure S7.** Forest plot – Hazard Ratio RFS (Univariate analysis). Survival impact of neoadjuvant chemotherapy (NAC) strategy according to variables – Recurrence Free Survival (RFS).

## Pre-NAC immune infiltration rates according to the months of the year at BC diagnosis

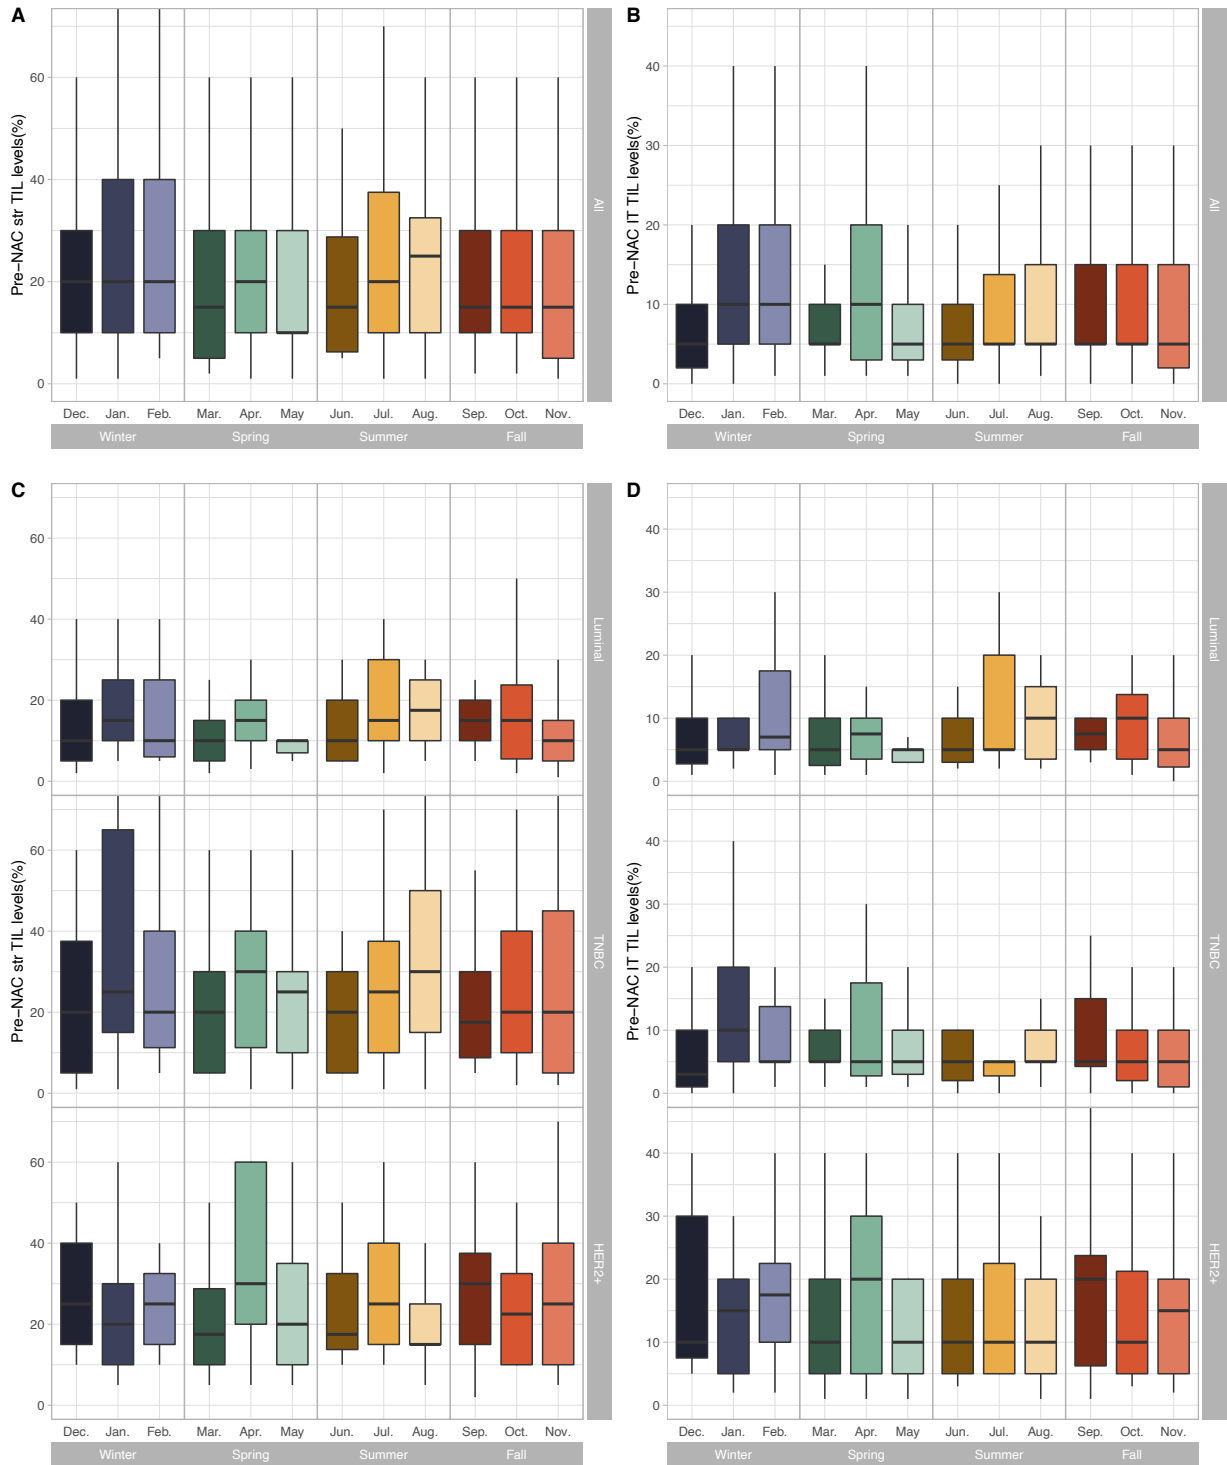

BC patients with pre-NAC str TIL levels available [n=717] and IT TIL levels [717]

**Supplementary Figure S1.** Associations between pre-NAC TILs and month in whole population, and after stratification by breast cancer subtype. Bottom and top bars of the boxplots represent the first and third quartiles, respectively, the medium bar is the median, and whiskers extend to 1.5 times the interquartile range. **A**, Pre-NAC str TIL levels according to month. **B**, Pre-NAC IT TIL levels according to month. **C**, Pre-NAC str TIL levels according to month and breast cancer subtype. **D**, Pre-NAC IT TIL levels according to month and breast cancer subtype.

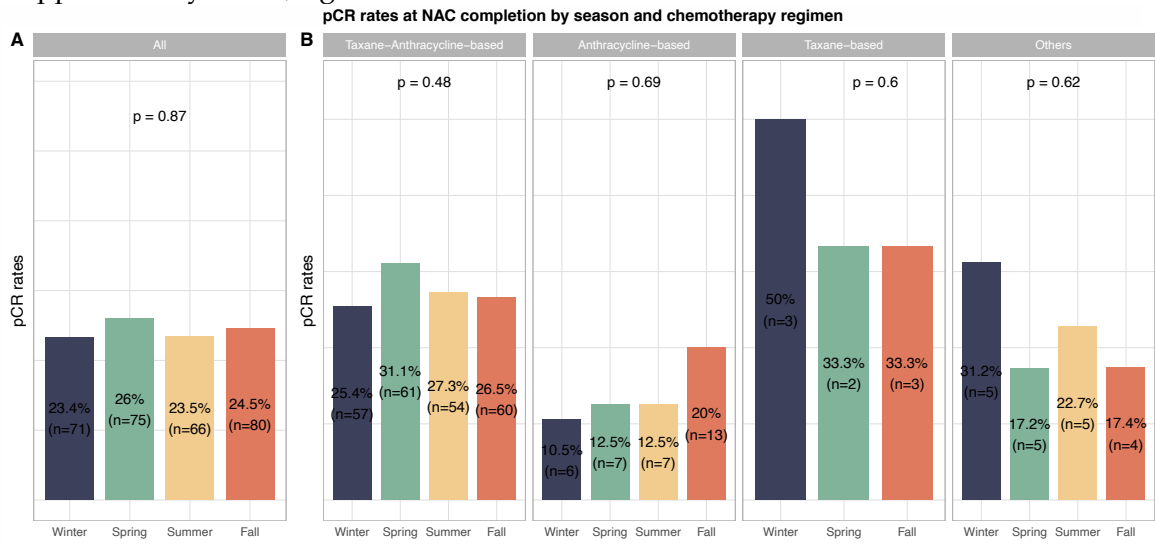

BC patients with pCR rates available treated with NAC [(n=1193); Taxane-Anthracycline-based (n= 844), Anthracycline-based (n= 234), Taxane-based (n= 24), Others (n= 90)]

**Supplementary Figure S2.** Barplot of associations between response to treatment and season at breast cancer diagnosis in the whole population, and by chemotherapy regimen. **A**, among the whole population. **B**, by chemotherapy regimen.

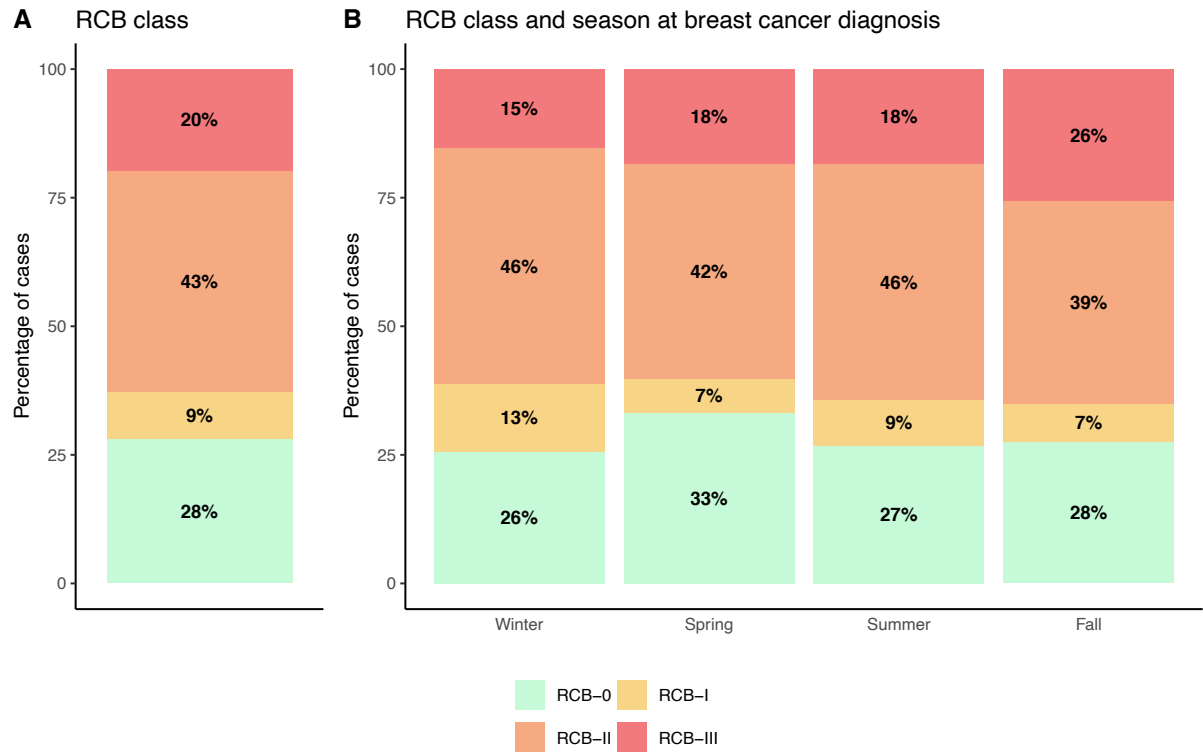

**Supplementary Figure S3.** RCB class distribution among the whole population and by season at breast cancer diagnosis. **A**, among the whole population. **B**, in each season.

## Post-NAC immune infiltration rates according to the season at BC diagnosis.

Wilcoxon test one by one (adjusted p-values)

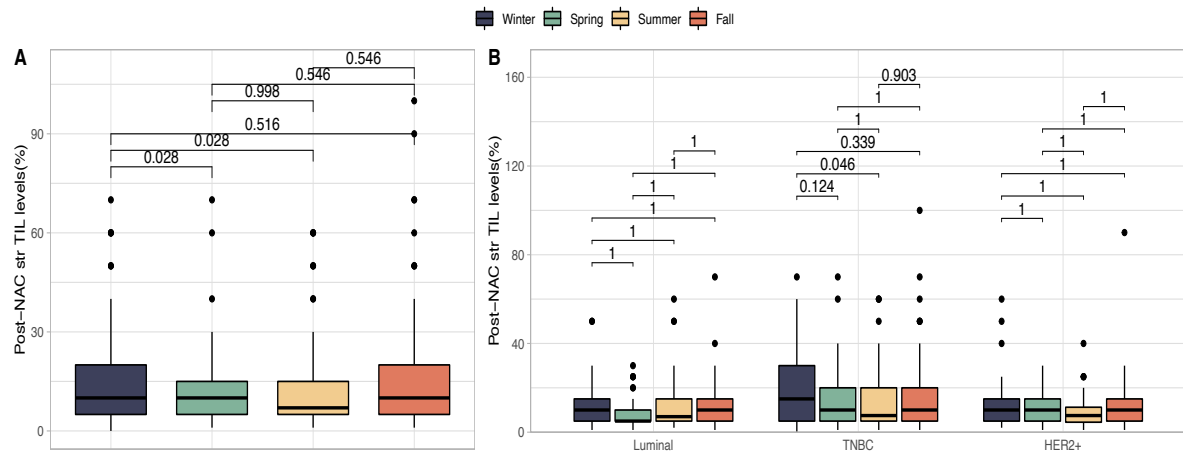

BC patients with post-NAC str TIL levels available [n=717]

**Supplementary Figure S4.** Post-NAC TIL levels by season at BC diagnosis in the general population and by breast cancer subtype. Differences among seasons. The first and third quartiles are represented by the bottom and top bars of the boxplots, respectively; the median is represented by the medium bar, and whiskers extend to 1.5 times the interquartile range. **A**, stromal lymphocytes among the whole population. **B**, stromal lymphocytes in each BC subtype.

## Post-NAC immune infiltration rates according to the months of the year at BC diagnosis

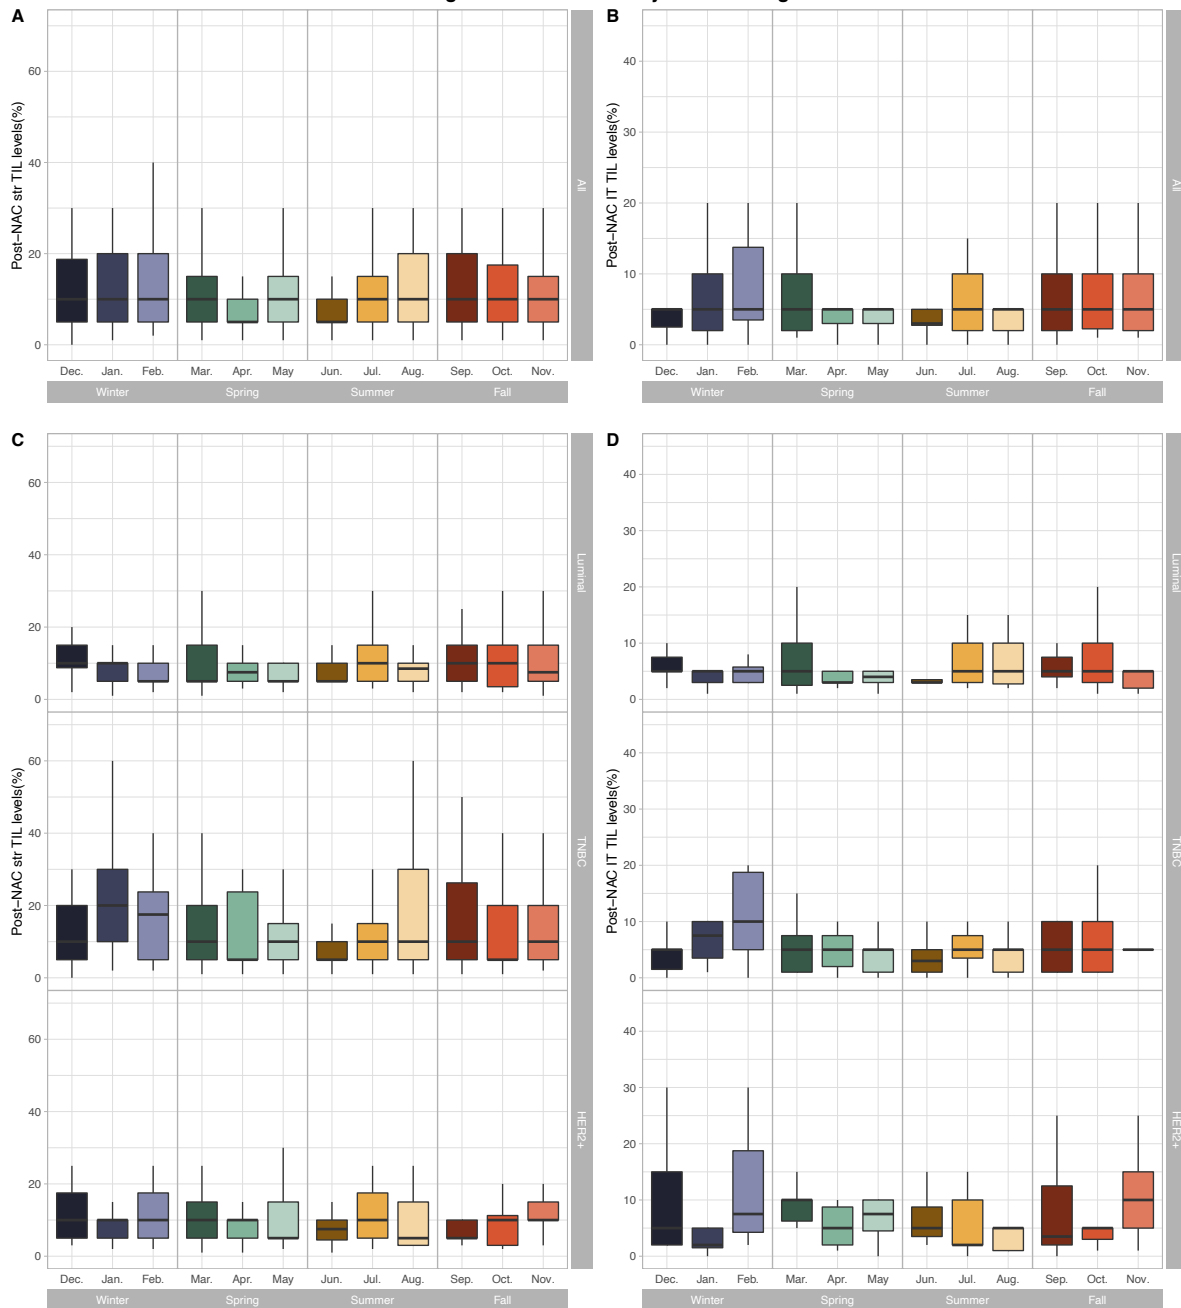

BC patients with post-NAC str TIL levels available [n=717] and IT TIL levels [483]

**Supplementary Figure S5.** Associations between post-NAC TILs and month in whole population, and after stratification by breast cancer subtype. Bottom and top bars of the boxplots represent the first and third quartiles, respectively, the medium bar is the median, and whiskers extend to 1.5 times the interquartile range. **A**, Post-NAC str TIL levels according to month. **B**, Post-NAC IT TIL levels according to month. **C**, Post-NAC str TIL levels according to month and breast cancer subtype. **D**, Post-NAC IT TIL levels according to month and breast cancer subtype.

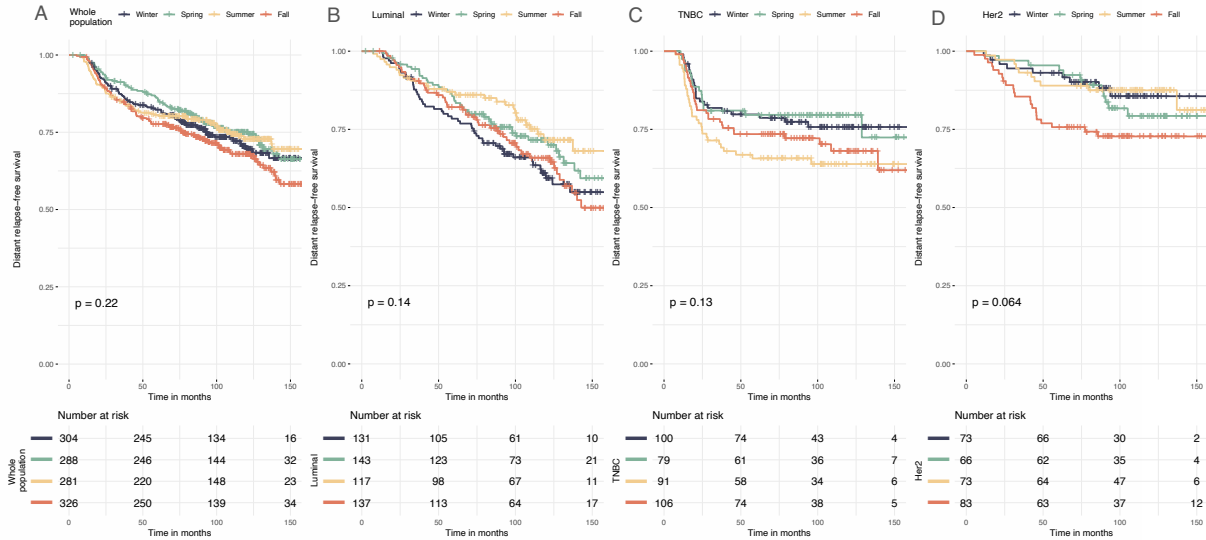

**Supplementary Figure S6.** Distant relapse-free survival curves by season at BC diagnosis. **A**, Distant relapse-free survival curves according to season. **B**, Distant relapse-free survival curves in Luminal breast cancer according to season. **C**, Distant relapse-free survival curves in TNBC breast cancer according to season. **D**, Distant relapse-free survival curves in Her2-positive breast cancer according to season.

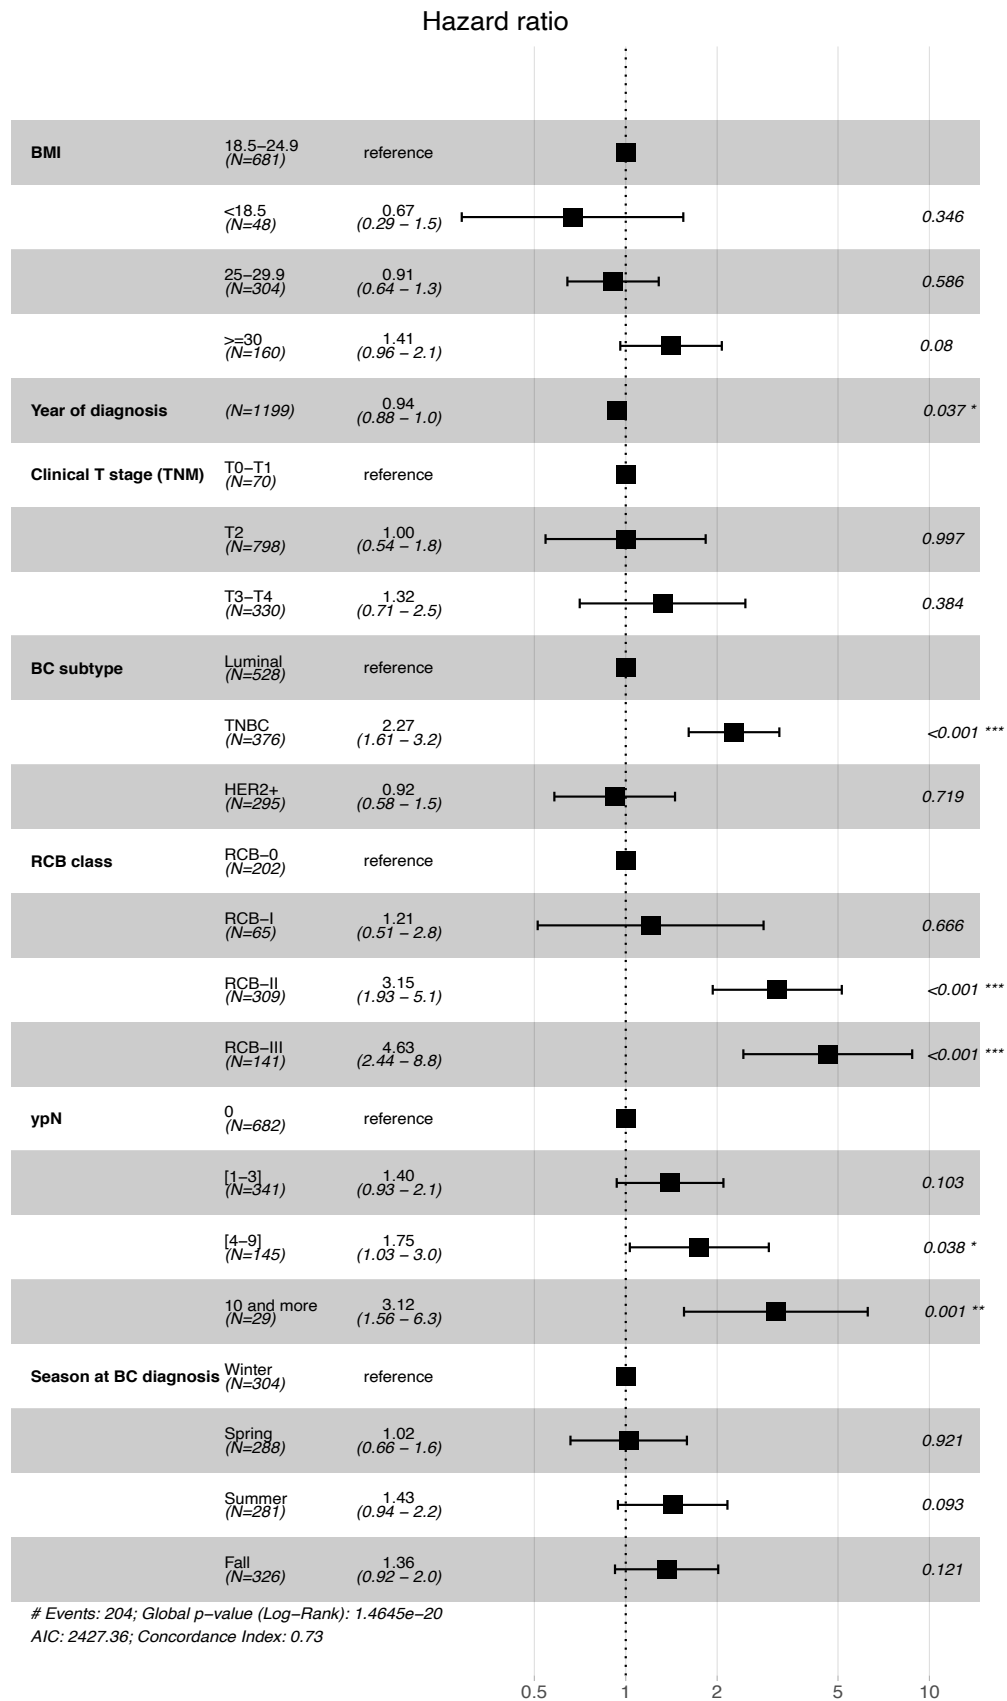

**Supplementary Figure S7.** Forest plot – Hazard Ratio RFS (Univariate analysis). Survival impact of neoadjuvant chemotherapy (NAC) strategy according to variables – Recurrence Free Survival (RFS).

**SUPPLEMENTARY TABLES****Supplementary Table S1.** Patients 'characteristics according to season in each tumor subtype.

*Missing data: Missing data:* Menopausal status, n=10; BMI, n=6; Smoking status, n=243; Hereditary predisposition, n=932; Clinical Tumor size (mm), n=1; Clinical T stage (TNM), n=1; Clinical N stage (TNM), n=1; SBR grade, n=42; KI67, n=617; Mitotic index, n=118; DCIS component, n=206; Stromal TIL levels (%), n=482; IT TIL levels (%), n=482; LVI, n=761; Histological type, n=63; Pathological complete response, n=6; RCB index (continuous), n=482; Residual Cancer Burden class, n=482; ypN, n=2; Stromal TIL levels (%) (post-NAC), n=482; IT TIL levels (%) (post-NAC), n=716.

*Abbreviations:* BMI=body mass index; NST= no special type; TNBC= triple negative breast cancer; str TILs= stromal tumor-infiltrating lymphocytes; IT TILs= intratumoral-infiltrating lymphocytes; pCR=Pathologic complete response. The "n" denotes the number of patients. In case of categorical variables, percentages are expressed between brackets. In case of continuous variables, mean value is reported. In case of nonnormal continuous variables, median value is reported, with interquartile range between brackets.

**Supplementary Table S2.** Association of season with pCR after univariate analysis in the whole population.

*Missing data: Missing data:* Menopausal status, n=10; BMI, n=6; Smoking status, n=243; Hereditary predisposition, n=932; Clinical Tumor size (mm), n=1; Clinical T stage (TNM), n=1; Clinical N stage (TNM), n=1; SBR grade, n=42; KI67, n=617; Mitotic index, n=118; DCIS component, n=206; Stromal TIL levels (%), n=482; IT TIL levels (%), n=482; LVI, n=761; Histological type, n=63; Pathological complete response, n=6; RCB index (continuous), n=482; Residual Cancer Burden class, n=482; ypN, n=2; Stromal TIL levels (%) (post-NAC), n=482; IT TIL levels (%) (post-NAC), n=716.

*Abbreviations:* BMI=body mass index; NST= no special type; TNBC= triple negative breast cancer; str TILs= stromal tumor-infiltrating lymphocytes; IT TILs= intratumoral-infiltrating lymphocytes; pCR=Pathologic complete response. The "n" denotes the number of patients. In case of categorical variables, percentages are expressed between brackets. In case of continuous variables, mean value is reported. In case of nonnormal continuous variables, median value is reported, with interquartile range between brackets.

**Supplementary Table S3.** Literature Review

*Abbreviations:* PR= progesterone receptor; ER= estrogen receptor; HR= hormone receptor; BC= breast cancer; HR= hazard ratio.



[illegible]

9

|                           | Class                      | n total | n in model | nb pcr | %pcr   | OR   | 95%CI           | pval             |
|---------------------------|----------------------------|---------|------------|--------|--------|------|-----------------|------------------|
| Age at BC diagnosis       |                            |         |            | 292    |        | 1    | [0.99 - 1.02]   | 0.589            |
| Menopausal status         | Premenopausal              | 747     | 744        | 173    | 23.3 % | 1    |                 |                  |
|                           | Postmenopausal             | 442     | 440        | 116    | 26.4 % | 1.18 | [0.9 - 1.55]    | 0.229            |
| BMI                       | 18.5-24.9                  | 681     | 680        | 171    | 25.1 % | 1    |                 |                  |
|                           | <18.5                      | 48      | 45         | 7      | 15.6 % | 0.55 | [0.22 - 1.18]   | 0.153            |
|                           | 25-29.9                    | 304     | 304        | 72     | 23.7 % | 0.92 | [0.67 - 1.26]   | 0.623            |
|                           | >=30                       | 160     | 158        | 39     | 24.7 % | 0.98 | [0.65 - 1.45]   | 0.904            |
| Smoking status            | Never                      | 623     | 621        | 172    | 27.7 % | 1    |                 |                  |
|                           | Current                    | 179     | 179        | 36     | 20.1 % | 0.66 | [0.43 - 0.98]   | <b>0.042</b>     |
|                           | Former                     | 154     | 154        | 45     | 29.2 % | 1.08 | [0.73 - 1.58]   | 0.706            |
| Year BC diagnosis         | 2002                       | 89      | 88         | 10     | 11.4 % | 1    |                 |                  |
|                           | 2003                       | 62      | 62         | 5      | 8.1 %  | 0.68 | [0.2 - 2.04]    | 0.509            |
|                           | 2004                       | 101     | 99         | 20     | 20.2 % | 1.97 | [0.89 - 4.65]   | 0.104            |
|                           | 2005                       | 127     | 125        | 30     | 24%    | 2.46 | [1.17 - 5.59]   | <b>0.023</b>     |
|                           | 2006                       | 143     | 143        | 27     | 18.9 % | 1.82 | [0.86 - 4.13]   | 0.134            |
|                           | 2007                       | 148     | 148        | 35     | 23.6 % | 2.42 | [1.17 - 5.41]   | <b>0.023</b>     |
|                           | 2008                       | 151     | 151        | 40     | 26.5 % | 2.81 | [1.37 - 6.25]   | <b>0.007</b>     |
|                           | 2009                       | 170     | 170        | 48     | 28.2 % | 3.07 | [1.52 - 6.75]   | <b>0.003</b>     |
|                           | 2010                       | 137     | 136        | 53     | 39%    | 4.98 | [2.46 - 11.01]  | <b>&lt;0.001</b> |
|                           | 2011                       | 60      | 60         | 19     | 31.7 % | 3.61 | [1.57 - 8.78]   | <b>0.003</b>     |
|                           | 2012                       | 11      | 11         | 5      | 45.5 % | 6.5  | [1.62 - 25.8]   | <b>0.007</b>     |
| Season of BC diagnosis    | Winter                     | 304     | 303        | 71     | 23.4 % | 1    |                 |                  |
|                           | Spring                     | 288     | 287        | 75     | 26.1 % | 1.16 | [0.8 - 1.68]    | 0.448            |
|                           | Summer                     | 281     | 279        | 66     | 23.7 % | 1.01 | [0.69 - 1.49]   | 0.949            |
|                           | Fall                       | 326     | 324        | 80     | 24.7 % | 1.07 | [0.74 - 1.55]   | 0.713            |
| Hereditary predisposition | No                         | 221     | 219        | 64     | 29.2 % | 1    |                 |                  |
|                           | Yes                        | 46      | 46         | 21     | 45.7 % | 2.03 | [1.06 - 3.89]   | <b>0.032</b>     |
| Clinical T stage (TNM)    | T0-T1                      | 70      | 70         | 32     | 45.7 % | 1    |                 |                  |
|                           | T2                         | 798     | 795        | 192    | 24.2 % | 0.38 | [0.23 - 0.62]   | <b>&lt;0.001</b> |
|                           | T3-T4                      | 330     | 327        | 68     | 20.8 % | 0.31 | [0.18 - 0.54]   | <b>&lt;0.001</b> |
| Clinical N stage (TNM)    | N0                         | 525     | 524        | 126    | 24%    | 1    |                 |                  |
|                           | N1-N2-N3                   | 673     | 668        | 166    | 24.9 % | 1.04 | [0.8 - 1.36]    | 0.749            |
| SBR grade                 | Grade I                    | 47      | 47         | 1      | 2.1 %  | 1    |                 |                  |
|                           | Grade II                   | 432     | 428        | 58     | 13.6 % | 7.21 | [1.53 - 128.94] | 0.053            |
|                           | Grade III                  | 678     | 677        | 225    | 33.2 % | 22.9 | [4.96 - 406.92] | <b>0.002</b>     |
| KI67                      | [0-10)                     | 65      | 65         | 3      | 4.6 %  | 1    |                 |                  |
|                           | [10-20)                    | 110     | 110        | 9      | 8.2 %  | 1.84 | [0.53 - 8.54]   | 0.373            |
|                           | >=20                       | 407     | 403        | 105    | 26.1 % | 7.28 | [2.63 - 30.25]  | <b>0.001</b>     |
| Mitotic index             | [0-7) mitose/2 mm2         | 341     | 338        | 45     | 13.3 % | 1    |                 |                  |
|                           | [7-13) mitose/2 mm2        | 295     | 294        | 67     | 22.8 % | 1.92 | [1.27 - 2.93]   | <b>0.002</b>     |
|                           | >=13 mitose ou plus/2 mm2. | 445     | 445        | 152    | 34.2 % | 3.38 | [2.35 - 4.93]   | <b>&lt;0.001</b> |
| BC subtype                | Luminal                    | 528     | 526        | 34     | 6.5 %  | 1    |                 |                  |
|                           | TNBC                       | 376     | 374        | 143    | 38.2 % | 8.96 | [6.04 - 13.62]  | <b>&lt;0.001</b> |
|                           | HER2+                      | 295     | 293        | 115    | 39.2 % | 9.35 | [6.21 - 14.4]   | <b>&lt;0.001</b> |
| DCIS component            | No                         | 604     | 602        | 180    | 29.9 % | 1    |                 |                  |
|                           | Yes                        | 389     | 388        | 76     | 19.6 % | 0.57 | [0.42 - 0.77]   | <b>&lt;0.001</b> |
| Stromal TIL levels (%)    | [0 -30[                    | 475     | 473        | 103    | 21.8 % | 1    |                 |                  |
|                           | >=30                       | 242     | 242        | 106    | 43.8 % | 2.8  | [2 - 3.92]      | <b>&lt;0.001</b> |
| IT TIL levels (%)         | [0,10]                     | 511     | 509        | 124    | 24.4 % | 1    |                 |                  |
|                           | (10,100]                   | 206     | 206        | 85     | 41.3 % | 2.18 | [1.55 - 3.07]   | <b>&lt;0.001</b> |
| LVI                       | No                         | 267     | 266        | 48     | 18%    | 1    |                 |                  |
|                           | Yes                        | 171     | 170        | 33     | 19.4 % | 1.09 | [0.66 - 1.78]   | 0.721            |
| Histological type         | NST                        | 1062    | 1058       | 271    | 25.6 % | 1    |                 |                  |
|                           | Others                     | 74      | 73         | 5      | 6.8 %  | 0.21 | [0.07 - 0.48]   | <b>0.001</b>     |

*Supplementary Table S2. Association of season with pCR after univariate analysis in the whole population.*

| Authors             | Country        | Journal                              | Type of source      | Research design      | Number of Patients (n) | Study population                                                                                       | Summary points                                                                                                                                                                                                                                                                                                                                                                                                                                                                                                                                                                                                                                      |
|---------------------|----------------|--------------------------------------|---------------------|----------------------|------------------------|--------------------------------------------------------------------------------------------------------|-----------------------------------------------------------------------------------------------------------------------------------------------------------------------------------------------------------------------------------------------------------------------------------------------------------------------------------------------------------------------------------------------------------------------------------------------------------------------------------------------------------------------------------------------------------------------------------------------------------------------------------------------------|
| Cohen (1983)        | Israel         | Cancer Research                      | Research            | Registry             | 2,948                  | Breast cancer with histopathological confirmation                                                      | There was a seasonal variation in the incidence of nonlocalized breast cancer diagnosis, with a peak during spring.                                                                                                                                                                                                                                                                                                                                                                                                                                                                                                                                 |
| Holdaway (1990)     | New Zealand    | Cancer Research                      | Research            | Prospective Cohort   | 2,706                  | Breast cancer                                                                                          | According to the month of initial tumor detection, tissue sampling, or surgery, there was a significant annual variation in PR receptor concentration. PR receptor concentrations were higher in patients diagnosed or operated on during April. There is also a significant cyclic variation in the month of detection of breast cancer with peak detection occurring in December (summer).                                                                                                                                                                                                                                                        |
| Mason (1990)        | New Zealand    | British Journal of Cancer            | Research            | Prospective Cohort   | 2,245                  | Incident breast cancer                                                                                 | Breast cancer diagnoses in spring and summer were associated with better survival. These patterns have been different according to the menopausal status and hormonal receptors. Postmenopausal women with ER positive tumours had 13% improvement in survival at 5 years if the initial tumour was detected in spring/summer ( $p < 0.0003$ , OR 2.04 [CI 1.38-3.01]). Premenopausal women with HR positive tumours there was no significant relationship between season of detection and survival. However, premenopausal patients had improved survival (26% at 5 years) if they had HR tumours which were found initially in the spring/summer. |
| Joensuu (1991)      | Finland        | British Journal of Cancer            | Research            | Retrospective Cohort | 401                    | Invasive, non bilateral breast cancer patients                                                         | Cancers diagnosed during January, February, or July-August to September-October had a poorer prognosis, further tumor necrosis, advanced mitotic count, and larger tumor size than if the diagnosis was made during the rest of the year ( $p = 0.03$ and $0.009$ , respectively).                                                                                                                                                                                                                                                                                                                                                                  |
| Ross (1997)         | USA            | Breast Cancer Research and Treatment | Short Communication | Case-control study   | 2,895                  | Breast cancer self-detected that required surgery                                                      | There was a statistically significant seasonal variation in the detection of BC, with peaks occurring in spring and late fall. Women under 40, had a spring peak detection ( $p = 0.089$ ) and women $\geq 40$ in late fall ( $p = 0.063$ ). The seasonal variation in detection was statistically significant only for the estrogen receptor-negative tumors ( $p = 0.003$ ).                                                                                                                                                                                                                                                                      |
| Gao (2001)          | Singapore      | British Journal of Cancer            | Short Communication | Registry             | 3,219                  | Breast cancer, histologically confirmed                                                                | There is no clear cut seasonal pattern, although fewer cases are diagnosed in January and February (close to the Western and Chinese New Year festivals). They appeared more numerous approximately six months later over the June to August period. Also, there were more ER+/PR+ BC in October, and tumors were bigger ( $\geq 1$ cm) if diagnoses were made in August.                                                                                                                                                                                                                                                                           |
| Paradiso (2001)     | Italy          | Breast Cancer Research and Treatment | Research            | Retrospective Cohort | 903                    | T1-3, N0-1M0 Invasive breast cancer, treated with radical mastectomy or lumpectomy and lymphadenectomy | There were no differences in nodal status or tumor size, ER, and PgR across seasons in the general population. Grade III tumors were significantly more frequent in spring. These patterns have been different according to the menopausal status of the patient. In premenopausal BC patients, ER had a peak in January and April; PgR in July ( $p < 0.05$ ). Also, tumor size had peaks in May and December ( $p < 0.01$ ). In menopausal patients, ER had a rise in November, no significant reproducible rhythm was reported for PgR, and tumor size had a peak in September.                                                                  |
| Lambe (2003)        | Sweden         | British Journal of Cancer            | Short Communication | Registry             | 60,143                 | Breast cancer                                                                                          | There was a seasonal variation in breast cancer detection, decreasing during the summer (-16.7%).                                                                                                                                                                                                                                                                                                                                                                                                                                                                                                                                                   |
| Lim (2006)          | United Kingdom | International Journal of Cancer      | Research            | Registry             | 182,895                | Breast cancer                                                                                          | Breast cancer diagnoses in summer and autumn were associated with better survival compared to breast cancer diagnoses in winter (HR 0.86 [95% CI 0.83-0.89]).                                                                                                                                                                                                                                                                                                                                                                                                                                                                                       |
| Porojnicu (2007)    | Norway         | Breast Cancer Research and Treatment | Research            | Registry             | 49,821                 | Breast cancer                                                                                          | Breast cancer diagnoses in summer had better prognosis (RR of death 15-25% lower for summer diagnosis versus winter diagnosis). There was no significant seasonal variation of the number of new cases.                                                                                                                                                                                                                                                                                                                                                                                                                                             |
| Roychoudhury (2008) | United Kingdom | International Journal of Cancer      | Research            | Registry             | 187,263                | Breast cancer                                                                                          | Diagnosis within the summertime season becomes related to significantly reduced mortality in the first month of diagnosis compared with winter (HR 0.81 [95% CI, 0.75-0.86]). However, at long-time follow-up ( $> 5$ years), there has been a steady shift within the seasonality pattern, with an autumn diagnosis related to reduced mortality (HR 0.93 [95% CI, 0.90-0.96]).                                                                                                                                                                                                                                                                    |

Supplementary Table S3. Literature Review

| Authors            | Country                                                                                                       | Journal                                     | Type of source   | Research design      | Number of Patients (n) | Study population                                   | Summary points                                                                                                                                                                                                                                                                                                                                                                                                 |
|--------------------|---------------------------------------------------------------------------------------------------------------|---------------------------------------------|------------------|----------------------|------------------------|----------------------------------------------------|----------------------------------------------------------------------------------------------------------------------------------------------------------------------------------------------------------------------------------------------------------------------------------------------------------------------------------------------------------------------------------------------------------------|
| Holmberg (2009)    | Sweden                                                                                                        | Cancer Causes Control                       | Research         | Registry             | 89 630                 | Breast cancer                                      | There was a higher HR of death in women diagnosed with BC in the summer (August vs January, HR 1.14 [95% CI, 1.09–1.19]). This difference coincided with a lower mean number of cases diagnosed per day, and a higher proportion of advanced cases diagnosed in the summer.                                                                                                                                    |
| Stajner (2009)     | Atlanta, Connecticut, Detroit, Hawaii, Iowa, New Mexico, San FranciscoOakland, Seattle, Puget Sound, and Utah | International Journal of Cancer             | Letter to editor | Registry             | 184 434                | Breast cancer                                      | After 12 years of follow up, BC diagnosed in winter between 1980–1986 had the highest cumulative probability of death [HR 0.32 [95% CI, 0.315–0.33] and the lowest if cases diagnosed in autumn (HR 0.29[95% CI,0.29–0.30]) and spring (HR 0.30[95% CI, 0.29–0.31]). However, for each of the other 2 periods (1973–1979 and 1987–1993) prognosis from BC was independent of the seasonality of the diagnosis. |
| Oh (2010)          | International study (88 cancer registries)                                                                    | Breast Cancer Research and Treatment        | Research         | Registry             | 2 921 714              | Breast cancer                                      | Breast cancer is diagnosed more often in spring and fall, both in the Northern and Southern Hemispheres. This seasonality is increasingly more prominent as population distance from the equator increases and this latitude dependence is most pronounced among women living in rural areas.                                                                                                                  |
| Teilum (2011)      | Denmark                                                                                                       | British Medical Journal Open                | Research         | Registry             | 79 658                 | Early invasive breast cancer that required surgery | There were no evidence of a seasonal variation in the survival after surgery for early BC                                                                                                                                                                                                                                                                                                                      |
| Kwon (2013)        | Korean                                                                                                        | Korean Journal of Clinical Oncology         | Research         | Registry             | 11 698                 | Breast cancer                                      | There were no differences in patient characteristics and ER, PR, tumor size, and lymph node involvement among the breast cancers diagnosed in spring/summer vs. autumn/winter, except for age ( $p < 0.01$ ) and HER2 status ( $p = 0.02$ ). Also, there were no differences in survival and relapse rates.                                                                                                    |
| Mutlu (2013)       | Turkey                                                                                                        | Asian Pacific Journal of Cancer Prevention  | Research         | Retrospective Cohort | 517                    | Breast cancer                                      | It was not found any statistically significant differences among groups regarding age, menopause status, stage of breast cancer, ER, PgR, Her2+, grade, lymphovascular invasion. Patients whose were diagnosed in winter had best mean DFS while summer group had worst DFS. When we evaluated mean OS, we did not find any differences ( $p=0.637$ ).                                                         |
| Ho (2014)          | USA                                                                                                           | Medical Science Monitor                     | Research         | Registry             | 19 204                 | Breast cancer                                      | BC diagnoses in summer had better prognosis than BC diagnoses in winter at all latitudes (HR 0.94 [95% CI, 0.94 to 0.94], $p = 0.002$ ).                                                                                                                                                                                                                                                                       |
| Kuzmickiene (2018) | Lithuania                                                                                                     | Journal of Cancer Research and Therapeutics | Research         | Retrospective Cohort | 991                    | Non-metastatic breast cancer patients              | BC diagnosis in summer and autumn had a 40% reduced risk for 0–3-year mortality when compared to those diagnosed in spring. The impact season of diagnosis on mortality was most pronounced in young patients. BC diagnosis in autumn is an independent predictor factor for better overall prognosis in women under the age of 50 years (HR = 0.61 [95% CI] 0.39–0.96, $p = 0.003$ ).                         |
| Tas (2021)         | Turkey                                                                                                        | Indian Journal of Surgery                   | Letter to editor | Retrospective Cohort | 5 477                  | Breast cancer                                      | The number of newly diagnosed breast cancer patients is significantly lower in summer than in any other season (summer (22.0%) vs spring (27.0%), autumn (25.6%) and winter (25.3%).                                                                                                                                                                                                                           |
| Wu (2021)          | USA                                                                                                           | Journal of Clinical Medicine                | Research         | Prospective Cohort   | 2 919                  | Primarily early stage breast cancer                | Blood collected in the winter season was associated with lower C-reactive (CRP) protein when compared to summer. In addition, moderate intakes of red meat were associated with reducing CRP in winter but not in other seasons. Increased intakes of fruit and vegetables were associated with reduced inflammation in most seasons except winter.                                                            |
| Yoon (2021)        | Korea                                                                                                         | Journal of Gastroenterology and Hepatology  | Research         | Retrospective Cohort | 1 313                  | Breast cancer                                      | There was a winter peak for breast cancer detection (72.7–76.3%) higher than for other cancers: thyroid cancer (44.1–59.4%), lung cancer (36.8–41.7%), kidney cancer (34.141.2%), and prostate cancer (27.7–34.7%).                                                                                                                                                                                            |

Supplementary Table S3. Literature Review (continuation)
